# Supplementary material for: SAGE: String-overlap Assembly of GEnomes
Source: PubMed Central journal article supplement (PMC4174676; doi:10.1186/1471-2105-15-302), 2014-09-15
Supplement: 12859_2014_6583_MOESM1_ESM.pdf [file 12859_2014_6583_MOESM1_ESM.pdf]

# SAGE: String-overlap Assembly of GENomes

LUCIAN ILIE, BAHLUL HAIDER, MICHAEL MOLNAR, and ROBERTO SOLIS-OBA

— Supplementary material —

## Details on running the programs

ABYSS version 1.3.4 was used with the following command:

```
abyss-pe k=[k-mer length] name=[output name] in=[input file]
```

SGA version 0.10.10 was used with the following commands:

```
sga preprocess -o [output file] [input file]
sga index -a ropebwt [input file]
sga correct -k [k-mer length] -o [output file] [input file]
sga index -a ropebwt [input file]
sga filter -x 2 [input file]
sga fm-merge -m [minimum overlap length] -o [output file] [input file]
sga index -d 1000000 [input file]
sga rmdup [input file]
sga overlap -m [minimum overlap length] [input file]
sga assemble -m [overlap length] -g 0 -r 10 -o [output file] [input file]
sga-align [contig file] [input file]
sga-bam2de.pl -n 5 [input file]
sga-astat.py -m 200 [input file] > [output file]
sga scaffold -m 200 --pe [paired-end file] -a [a-statistic file] -o [output file] [contig file]
sga scaffold2fasta -m 200 -a [graph file] -o [output file] -d 1 --use-overlap --write-unplaced [input file]
```

SOAPdenovo2 version 2.04 was used with following command:

```
SOAPdenovo all -s [configuration file] -K [k-mer length] -p 1 -o [output file]
```

SPAdes version 3.1.0 was used with the following command:

```
spades.py -1 [forward reads] -2 [reverse reads] -t [number of threads] -o [output directory]
```

SAGE was used with following command:

```
sage [input file(s)] [output file] [min overlap]
```

QUAST was used with the following command:

```
quast.py --min-contig 200 -o [output name] -R [reference file] [scaffold files]
```

## Complete comparison results

The complete comparison using QUAST is presented in the following pages.

| Dataset                   | Accession # | Read Length | Per-Base Error | Reference Genome | Genome Length | Number of Reads | Total bp      | Coverage |
|---------------------------|-------------|-------------|----------------|------------------|---------------|-----------------|---------------|----------|
| <i>B.subtilis</i>         | DRR000852   | 75          | 0.58%          | NC_000964.3      | 4,215,606     | 3,519,504       | 263,962,800   | 62.62    |
| <i>C.trachomatis</i>      | ERR021957   | 37          | 3.90%          | NC_000117.1      | 1,042,519     | 7,825,944       | 289,559,928   | 277.75   |
| <i>S.pseudopneumoniae</i> | SRR387784   | 100         | 1.06%          | NC_015875.1      | 2,190,731     | 4,407,248       | 440,724,800   | 201.18   |
| <i>F.tularensis</i>       | SRR063416   | 101         | 0.60%          | NC_006570.2      | 1,892,775     | 6,907,220       | 697,629,220   | 368.57   |
| <i>L.interrogans</i>      | SRR397962   | 100         | 0.21%          | NC_005823.1      | 4,277,185     | 7,127,250       | 712,725,000   | 166.63   |
| <i>P.gingivalis</i>       | SRR413299   | 100         | 0.23%          | NC_002950.2      | 2,343,476     | 9,497,946       | 949,794,600   | 405.29   |
| <i>E.coli</i>             | SRR072099   | 36          | 0.87%          | NC_000913.2      | 4,639,675     | 30,355,432      | 1,092,795,552 | 235.53   |
| <i>C.thermocellum</i>     | SRR400550   | 36          | 2.91%          | NC_009012.1      | 3,843,301     | 31,994,160      | 1,151,789,760 | 299.69   |
| <i>C.elegans</i>          | SRR065390   | 100         | 0.35%          | c_elegans        | 100,286,070   | 67,617,092      | 6,761,709,200 | 67.42    |

| Dataset                   | Exact search  |          | BWA           |              |          |
|---------------------------|---------------|----------|---------------|--------------|----------|
|                           | bp mapped     | % mapped | bp mapped     | reads mapped | % mapped |
| <i>B.subtilis</i>         | 170,408,550   | 64.56%   | 251,541,675   | 3,353,889    | 95.29%   |
| <i>C.trachomatis</i>      | 66,376,631    | 22.92%   | 129,671,532   | 3,504,636    | 44.78%   |
| <i>S.pseudopneumoniae</i> | 152,253,200   | 34.55%   | 408,639,600   | 4,086,396    | 92.72%   |
| <i>F.tularensis</i>       | 381,587,393   | 54.70%   | 691,743,344   | 6,848,944    | 99.16%   |
| <i>L.interrogans</i>      | 578,226,000   | 81.13%   | 661,384,300   | 6,613,843    | 92.80%   |
| <i>P.gingivalis</i>       | 752,283,200   | 79.20%   | 945,429,000   | 9,454,290    | 99.54%   |
| <i>E.coli</i>             | 796,578,120   | 72.89%   | 887,065,884   | 24,640,719   | 81.17%   |
| <i>C.thermocellum</i>     | 397,718,244   | 34.53%   | 415,224,504   | 11,534,014   | 36.05%   |
| <i>C.elegans</i>          | 4,768,401,900 | 70.52%   | 6,492,212,600 | 64,922,126   | 96.01%   |

**NGA50**

|                   | <b>ABySS</b>   | <b>SGA</b> | <b>SOAP2</b> | <b>SPAdes</b>  | <b>SAGE</b>    |
|-------------------|----------------|------------|--------------|----------------|----------------|
| B.subtilis        | 423,890        | 68,419     | 551,507      | 441,472        | <b>924,197</b> |
| C.trachomatis     | 301,840        | 97,593     | 225,668      | <b>696,260</b> | 669,089        |
| S.pseudopneumonie | 23,245         | 21,876     | 26,356       | 18,167         | <b>30,232</b>  |
| F.tularensis      | <b>25,749</b>  | 23,314     | 23,294       | 23,762         | 23,961         |
| L.interrogans     | 117,711        | 83,128     | 132,993      | 38,735         | <b>182,864</b> |
| P.gingivalis      | 35,564         | 37,013     | 42,835       | 32,926         | <b>54,125</b>  |
| E.coli            | <b>101,741</b> | 10,038     | 98,665       | 36,300         | 96,980         |
| C.thermocellum    | 52,944         | 23,747     | 54,744       | 52,142         | <b>54,883</b>  |
| C.elegans         | 18,210         | 20,436     | 31,973       | 20,468         | <b>32,442</b>  |
| AVERAGE           | 122,322        | 42,840     | 132,004      | 151,137        | <b>229,864</b> |

**NGA75**

|                   | <b>ABySS</b>  | <b>SGA</b> | <b>SOAP2</b> | <b>SPAdes</b>  | <b>SAGE</b>   |
|-------------------|---------------|------------|--------------|----------------|---------------|
| B.subtilis        | 162,208       | 40,124     | 306,202      | <b>306,452</b> | 306,386       |
| C.trachomatis     | 160,704       | 51,570     | 125,082      | <b>339,321</b> | 307,765       |
| S.pseudopneumonie | 9,847         | 7,570      | 6,785        | 6,052          | <b>10,040</b> |
| F.tularensis      | <b>14,491</b> | 13,117     | 13,117       | 13,638         | 13,377        |
| L.interrogans     | 58,556        | 40,333     | 64,594       | 22,071         | <b>87,232</b> |
| P.gingivalis      | 20,005        | 18,062     | 19,982       | 15,716         | <b>25,176</b> |
| E.coli            | <b>56,943</b> | 5,270      | 54,790       | 18,706         | 54,784        |
| C.thermocellum    | 28,805        | 8,618      | 25,243       | 25,255         | <b>29,529</b> |
| C.elegans         | 7,126         | 7,596      | 13,232       | 8,122          | <b>14,095</b> |
| AVERAGE           | 57,632        | 21,362     | 69,892       | 83,926         | <b>94,265</b> |

**Largest alignment**

|                   | <b>ABySS</b>   | <b>SGA</b>     | <b>SOAP2</b> | <b>SPAdes</b>    | <b>SAGE</b>    |
|-------------------|----------------|----------------|--------------|------------------|----------------|
| B.subtilis        | 800,991        | 241,307        | 1,014,436    | <b>1,037,023</b> | 1,016,322      |
| C.trachomatis     | 359,339        | 210,791        | 339,457      | <b>696,260</b>   | 669,089        |
| S.pseudopneumonie | <b>125,616</b> | <b>125,616</b> | 125,563      | 74,151           | <b>125,616</b> |
| F.tularensis      | 87,729         | 87,426         | 87,417       | 87,801           | <b>87,862</b>  |
| L.interrogans     | 413,583        | 319,895        | 320,270      | 137,901          | <b>550,746</b> |
| P.gingivalis      | <b>172,567</b> | 167,699        | 167,686      | 154,317          | 172,565        |
| E.coli            | 326,073        | 54,214         | 325,634      | 162,291          | <b>326,332</b> |
| C.thermocellum    | 186,547        | 106,016        | 186,433      | <b>195,919</b>   | 186,424        |
| C.elegans         | 213,835        | 239,959        | 382,096      | 171,314          | <b>383,476</b> |
| AVERAGE           | 298,476        | 172,547        | 327,666      | 301,886          | <b>390,937</b> |

**Genome fraction (%)**

|                   | <b>ABySS</b> | <b>SGA</b> | <b>SOAP2</b> | <b>SPAdes</b> | <b>SAGE</b>  |
|-------------------|--------------|------------|--------------|---------------|--------------|
| B.subtilis        | <b>99.04</b> | 98.67      | 98.63        | 98.63         | 98.95        |
| C.trachomatis     | 98.57        | 98.04      | 94.65        | 99.36         | <b>99.49</b> |
| S.pseudopneumonie | <b>83.30</b> | 82.82      | 81.54        | 82.01         | 83.19        |
| F.tularensis      | <b>95.61</b> | 93.07      | 92.58        | 93.80         | 93.56        |
| L.interrogans     | 99.49        | 98.77      | 98.75        | 95.15         | <b>99.67</b> |
| P.gingivalis      | <b>97.97</b> | 95.08      | 95.62        | 95.95         | 97.77        |
| E.coli            | <b>95.62</b> | 94.10      | 94.80        | 95.09         | 95.42        |
| C.thermocellum    | 95.78        | 92.63      | 92.81        | 94.08         | <b>95.85</b> |
| C.elegans         | 95.49        | 95.19      | 95.28        | 95.48         | <b>96.94</b> |
| AVERAGE           | <b>95.65</b> | 94.26      | 93.85        | 94.40         | <b>95.65</b> |

**# unaligned contigs**

|                   | ABySS | SGA | SOAP2 | SPAdes | SAGE |
|-------------------|-------|-----|-------|--------|------|
| B.subtilis        | 1     | 0   | 8     | 3      | 0    |
| C.trachomatis     | 10    | 16  | 16    | 10     | 19   |
| S.pseudopneumonie | 3     | 26  | 29    | 30     | 14   |
| F.tularensis      | 0     | 1   | 2     | 11     | 1    |
| L.interrogans     | 0     | 1   | 0     | 266    | 0    |
| P.gingivalis      | 0     | 0   | 0     | 423    | 0    |
| E.coli            | 1     | 4   | 1     | 2      | 2    |
| C.thermocellum    | 1     | 0   | 11    | 1      | 3    |
| C.elegans         | 978   | 304 | 272   | 363    | 267  |
| Total             | 994   | 352 | 339   | 1109   | 306  |

**# misassemblies**

|                   | ABySS | SGA | SOAP2 | SPAdes | SAGE |
|-------------------|-------|-----|-------|--------|------|
| B.subtilis        | 1     | 0   | 0     | 1      | 10   |
| C.trachomatis     | 1     | 1   | 1     | 1      | 1    |
| S.pseudopneumonie | 149   | 108 | 118   | 115    | 169  |
| F.tularensis      | 94    | 35  | 34    | 28     | 26   |
| L.interrogans     | 8     | 2   | 7     | 114    | 11   |
| P.gingivalis      | 10    | 5   | 15    | 8      | 17   |
| E.coli            | 26    | 4   | 5     | 22     | 25   |
| C.thermocellum    | 18    | 1   | 9     | 6      | 32   |
| C.elegans         | 1399  | 144 | 246   | 713    | 1196 |
| AVERAGE           | 190   | 33  | 48    | 112    | 165  |

**# local misassemblies**

|                   | ABySS | SGA  | SOAP2 | SPAdes | SAGE |
|-------------------|-------|------|-------|--------|------|
| B.subtilis        | 0     | 0    | 13    | 1      | 11   |
| C.trachomatis     | 11    | 5    | 41    | 9      | 26   |
| S.pseudopneumonie | 100   | 87   | 85    | 78     | 93   |
| F.tularensis      | 46    | 46   | 47    | 46     | 56   |
| L.interrogans     | 29    | 42   | 58    | 159    | 28   |
| P.gingivalis      | 11    | 17   | 40    | 10     | 14   |
| E.coli            | 80    | 1    | 71    | 17     | 83   |
| C.thermocellum    | 9     | 0    | 69    | 6      | 164  |
| C.elegans         | 6282  | 2209 | 2703  | 839    | 1474 |
| AVERAGE           | 730   | 267  | 347   | 129    | 217  |

**mismatch + indels**

|                   | ABySS   | SGA     | SOAP2   | SPAdes  | SAGE    |
|-------------------|---------|---------|---------|---------|---------|
| B.subtilis        | 8.65    | 2.18    | 7.14    | 5.78    | 19.95   |
| C.trachomatis     | 825.09  | 833.32  | 817.64  | 834.67  | 831.27  |
| S.pseudopneumonie | 2407.49 | 2417.37 | 2387.42 | 2368.18 | 2406.82 |
| F.tularensis      | 518.38  | 522.02  | 527.28  | 509.66  | 503.81  |
| L.interrogans     | 19.01   | 18.89   | 45.86   | 581.17  | 15.81   |
| P.gingivalis      | 10.80   | 35.81   | 13.83   | 22.33   | 17.41   |
| E.coli            | 36.20   | 8.82    | 29.77   | 17.77   | 29.95   |
| C.thermocellum    | 14.45   | 3.15    | 73.19   | 28.18   | 17.96   |
| C.elegans         | 50.08   | 34.33   | 34.84   | 76.92   | 60.89   |

|                   | Time (s) |         |            |         |              |
|-------------------|----------|---------|------------|---------|--------------|
|                   | ABySS    | SGA     | SOAP2      | SPAdes  | SAGE         |
| B.subtilis        | 546      | 2,940   | 180        | 1,791   | <b>139</b>   |
| C.trachomatis     | 740      | 4,050   | <b>158</b> | 3,549   | 165          |
| S.pseudopneumonie | 455      | 5,673   | <b>157</b> | 2,942   | 163          |
| F.tularensis      | 985      | 9,307   | 373        | 4,651   | <b>239</b>   |
| L.interrogans     | 807      | 9,757   | <b>243</b> | 5,012   | 304          |
| P.gingivalis      | 851      | 12,963  | 283        | 8,042   | <b>268</b>   |
| E.coli            | 1,947    | 12,051  | 492        | 5,158   | <b>486</b>   |
| C.thermocellum    | 2,960    | 4,853   | <b>419</b> | 3,313   | 3,501        |
| C.elegans         | 26,991   | 134,412 | 9,913      | 133,348 | <b>5,494</b> |

|                   | Time(s/Mbp) |       |             |        |             |
|-------------------|-------------|-------|-------------|--------|-------------|
|                   | ABySS       | SGA   | SOAP2       | SPAdes | SAGE        |
| B.subtilis        | 2.07        | 11.14 | 0.68        | 6.79   | <b>0.53</b> |
| C.trachomatis     | 2.56        | 13.99 | <b>0.55</b> | 12.26  | 0.57        |
| S.pseudopneumonie | 1.03        | 12.87 | <b>0.36</b> | 6.68   | 0.37        |
| F.tularensis      | 1.41        | 13.34 | 0.53        | 6.67   | <b>0.34</b> |
| L.interrogans     | 1.13        | 13.69 | <b>0.34</b> | 7.03   | 0.43        |
| P.gingivalis      | 2.05        | 12.69 | 0.52        | 5.43   | <b>0.51</b> |
| E.coli            | 1.78        | 11.03 | 0.45        | 4.72   | <b>0.44</b> |
| C.thermocellum    | 2.57        | 4.21  | <b>0.36</b> | 2.88   | 3.04        |
| C.elegans         | 3.99        | 19.88 | 1.47        | 19.72  | <b>0.81</b> |
| Average           | 2.07        | 12.54 | <b>0.58</b> | 8.02   | 0.78        |

|                   | Space (MB)    |        |        |              |            |
|-------------------|---------------|--------|--------|--------------|------------|
|                   | ABySS         | SGA    | SOAP2  | SPAdes       | SAGE       |
| B.subtilis        | 996           | 2,209  | 4,526  | 1,562        | <b>792</b> |
| C.trachomatis     | 2,244         | 3,474  | 6,381  | 6,626        | <b>878</b> |
| S.pseudopneumonie | <b>451</b>    | 4,066  | 6,698  | 1,314        | 785        |
| F.tularensis      | <b>750</b>    | 6,813  | 9,545  | 1,216        | 1,009      |
| L.interrogans     | <b>703</b>    | 7,036  | 7,797  | 2,218        | 1,357      |
| P.gingivalis      | <b>533</b>    | 9,396  | 8,963  | 3,974        | 1,165      |
| E.coli            | <b>1,777</b>  | 12,649 | 9,046  | 3,545        | 3,089      |
| C.thermocellum    | 1,607         | 5,130  | 7,624  | <b>1,049</b> | 6,891      |
| C.elegans         | <b>15,042</b> | 66,937 | 33,386 | 48,511       | 17,206     |

|                   | Space(MB/Mbp) |       |       |             |             |
|-------------------|---------------|-------|-------|-------------|-------------|
|                   | ABySS         | SGA   | SOAP2 | SPAdes      | SAGE        |
| B.subtilis        | 3.77          | 8.37  | 17.15 | 5.92        | <b>3.00</b> |
| C.trachomatis     | 7.75          | 12.00 | 22.04 | 22.88       | <b>3.03</b> |
| S.pseudopneumonie | <b>1.02</b>   | 9.23  | 15.20 | 2.98        | 1.78        |
| F.tularensis      | <b>1.08</b>   | 9.77  | 13.68 | 1.74        | 1.45        |
| L.interrogans     | <b>0.99</b>   | 9.87  | 10.94 | 3.11        | 1.90        |
| P.gingivalis      | <b>1.87</b>   | 13.32 | 9.52  | 3.73        | 3.25        |
| E.coli            | <b>1.63</b>   | 11.57 | 8.28  | 3.24        | 2.83        |
| C.thermocellum    | 1.40          | 4.45  | 6.62  | <b>0.91</b> | 5.98        |
| C.elegans         | <b>2.22</b>   | 9.90  | 4.94  | 7.17        | 2.54        |
| Average           | <b>2.41</b>   | 9.83  | 12.04 | 5.74        | 2.86        |

| B.subtilis                  | ABySS      | SGA        | SOAP2      | SPAdes     | SAGE       |
|-----------------------------|------------|------------|------------|------------|------------|
| # contigs (>= 0 bp)         | 89         | 137        | 101        | 49         | 52         |
| # contigs (>= 1000 bp)      | 29         | 96         | 19         | 24         | 16         |
| Total length (>= 0 bp)      | 4,190,353  | 4,162,396  | 4,169,882  | 4,170,766  | 4,178,935  |
| Total length (>= 1000 bp)   | 4,183,291  | 4,149,193  | 4,153,022  | 4,164,264  | 4,167,141  |
| # contigs                   | 31         | 137        | 43         | 38         | 40         |
| Total length                | 4,184,306  | 4,162,396  | 4,162,960  | 4,169,622  | 4,177,292  |
| Largest contig              | 800,991    | 241,307    | 1,014,549  | 1,046,888  | 1,086,665  |
| Reference length            | 4,215,606  | 4,215,606  | 4,215,606  | 4,215,606  | 4,215,606  |
| GC (%)                      | 43         | 43         | 43         | 43         | 43         |
| Reference GC (%)            | 44         | 44         | 44         | 44         | 44         |
| N50                         | 423,890    | 77,429     | 551,774    | 441,472    | 1,021,379  |
| NG50                        | 423,890    | 68,419     | 551,774    | 441,472    | 1,021,379  |
| N75                         | 162,208    | 41,567     | 306,202    | 306,452    | 602,762    |
| NG75                        | 162,208    | 40,124     | 306,202    | 306,452    | 602,762    |
| L50                         | 4          | 18         | 3          | 3          | 2          |
| LG50                        | 4          | 19         | 3          | 3          | 2          |
| L75                         | 8          | 37         | 5          | 6          | 4          |
| LG75                        | 8          | 38         | 5          | 6          | 4          |
| # misassemblies             | 1          | -          | -          | 1          | 10         |
| Misassembled contigs length | 83,884     | -          | -          | 1,148      | 2,712,488  |
| # local misassemblies       | -          | -          | 13         | 1          | 11         |
| # unaligned contigs         | 1 + 0 part | 0 + 0 part | 8 + 2 part | 3 + 0 part | 0 + 0 part |
| Unaligned contigs length    | 1,105      | -          | 4,980      | 643        | -          |
| Genome fraction (%)         | 99.04      | 98.67      | 98.63      | 98.63      | 98.95      |
| Duplication ratio           | 1.00       | 1.00       | 1.01       | 1.01       | 1.03       |
| # N's per 100 kbp           | 23.54      | -          | 101.42     | 0.00       | 1.72       |
| # mismatches per 100 kbp    | 4.67       | 1.80       | 0.94       | 4.14       | 3.64       |
| # indels per 100 kbp        | 3.98       | 0.38       | 6.20       | 1.64       | 1.97       |
| Largest alignment           | 800,991    | 241,307    | 1,014,436  | 1,037,023  | 1,016,322  |
| NA50                        | 423,890    | 77,429     | 551,507    | 441,472    | 924,197    |
| NGA50                       | 423,890    | 68,419     | 551,507    | 441,472    | 924,197    |
| NA75                        | 162,208    | 41,567     | 306,202    | 306,452    | 306,386    |
| NGA75                       | 162,208    | 40,124     | 306,202    | 306,452    | 306,386    |
| LA50                        | 4          | 18         | 3          | 3          | 3          |
| LGA50                       | 4          | 19         | 3          | 3          | 3          |
| LA75                        | 8          | 37         | 5          | 6          | 4          |
| LGA75                       | 8          | 38         | 5          | 6          | 4          |

| C.trachomatis               | ABYSS       | SGA         | SOAP2       | SPAdes      | SAGE        |
|-----------------------------|-------------|-------------|-------------|-------------|-------------|
| # contigs (>= 0 bp)         | 3,885       | 41          | 61          | 670         | 65          |
| # contigs (>= 1000 bp)      | 12          | 23          | 13          | 3           | 18          |
| Total length (>= 0 bp)      | 1,283,435   | 1,041,508   | 1,060,836   | 1,094,081   | 1,072,871   |
| Total length (>= 1000 bp)   | 1,125,773   | 1,033,593   | 1,049,906   | 1,062,422   | 1,060,643   |
| # contigs                   | 19          | 41          | 30          | 11          | 38          |
| Total length                | 1,129,360   | 1,041,508   | 1,056,562   | 1,066,557   | 1,069,071   |
| Largest contig              | 452,436     | 219,718     | 478,703     | 1,038,489   | 670,146     |
| Reference length            | 1,042,519   | 1,042,519   | 1,042,519   | 1,042,519   | 1,042,519   |
| GC (%)                      | 41          | 41          | 41          | 41          | 41          |
| Reference GC (%)            | 41          | 41          | 41          | 41          | 41          |
| N50                         | 301,988     | 97,635      | 237,708     | 1,038,489   | 670,146     |
| NG50                        | 301,988     | 97,635      | 237,708     | 1,038,489   | 670,146     |
| N75                         | 160,704     | 51,999      | 161,641     | 1,038,489   | 311,563     |
| NG75                        | 160,704     | 51,999      | 161,641     | 1,038,489   | 311,563     |
| L50                         | 2           | 4           | 2           | 1           | 1           |
| LG50                        | 2           | 4           | 2           | 1           | 1           |
| L75                         | 3           | 7           | 3           | 1           | 2           |
| LG75                        | 3           | 7           | 3           | 1           | 2           |
| # misassemblies             | 1           | 1           | 1           | 1           | 1           |
| Misassembled contigs length | 452,436     | 219,718     | 478,703     | 1,038,489   | 28,637      |
| # local misassemblies       | 11          | 5           | 41          | 9           | 26          |
| # unaligned contigs         | 10 + 1 part | 16 + 3 part | 16 + 1 part | 10 + 0 part | 19 + 3 part |
| Unaligned contigs length    | 23,087      | 18,371      | 24,029      | 28,068      | 35,552      |
| Genome fraction (%)         | 98.57       | 98.04       | 94.65       | 99.36       | 99.49       |
| Duplication ratio           | 1.08        | 1.00        | 1.05        | 1.00        | 1.01        |
| # N's per 100 kbp           | 131.76      | -           | 1,528.54    | 25.03       | 113.28      |
| # mismatches per 100 kbp    | 765.93      | 770.41      | 693.39      | 763.23      | 755.58      |
| # indels per 100 kbp        | 59.16       | 62.91       | 124.25      | 71.44       | 137.90      |
| Largest alignment           | 359,339     | 210,791     | 339,457     | 696,260     | 669,089     |
| NA50                        | 301,840     | 97,593      | 225,668     | 696,260     | 669,089     |
| NGA50                       | 301,840     | 97,593      | 225,668     | 696,260     | 669,089     |
| NA75                        | 143,144     | 51,570      | 125,082     | 339,321     | 307,765     |
| NGA75                       | 160,704     | 51,570      | 125,082     | 339,321     | 307,765     |
| LA50                        | 2           | 4           | 2           | 1           | 1           |
| LGA50                       | 2           | 4           | 2           | 1           | 1           |
| LA75                        | 4           | 7           | 4           | 2           | 2           |
| LGA75                       | 3           | 7           | 4           | 2           | 2           |

| S.pseudopneumonie           | ABySS       | SGA          | SOAP2        | SPAdes       | SAGE         |
|-----------------------------|-------------|--------------|--------------|--------------|--------------|
| # contigs (>= 0 bp)         | 232         | 177          | 546          | 315          | 123          |
| # contigs (>= 1000 bp)      | 82          | 85           | 66           | 108          | 65           |
| Total length (>= 0 bp)      | 2,226,218   | 2,112,309    | 2,168,503    | 2,140,097    | 2,203,782    |
| Total length (>= 1000 bp)   | 2,197,826   | 2,077,654    | 2,081,837    | 2,093,239    | 2,185,902    |
| # contigs                   | 95          | 177          | 161          | 186          | 97           |
| Total length                | 2,206,161   | 2,112,309    | 2,116,867    | 2,127,769    | 2,200,326    |
| Largest contig              | 203,373     | 202,327      | 202,223      | 114,391      | 203,300      |
| Reference length            | 2,190,731   | 2,190,731    | 2,190,731    | 2,190,731    | 2,190,731    |
| GC (%)                      | 40          | 40           | 40           | 40           | 40           |
| Reference GC (%)            | 40          | 40           | 40           | 40           | 40           |
| N50                         | 56,054      | 43,415       | 59,758       | 29,226       | 69,356       |
| NG50                        | 56,054      | 43,415       | 53,932       | 28,427       | 69,356       |
| N75                         | 24,793      | 20,711       | 27,200       | 16,679       | 33,835       |
| NG75                        | 25,983      | 18,496       | 24,367       | 15,367       | 33,835       |
| L50                         | 11          | 14           | 11           | 18           | 9            |
| LG50                        | 11          | 14           | 12           | 19           | 9            |
| L75                         | 27          | 31           | 25           | 42           | 20           |
| LG75                        | 26          | 34           | 27           | 45           | 20           |
| # misassemblies             | 149         | 108          | 118          | 115          | 169          |
| Misassembled contigs length | 1,930,978   | 1,545,999    | 1,710,308    | 1,536,786    | 1,933,903    |
| # local misassemblies       | 100         | 87           | 85           | 78           | 93           |
| # unaligned contigs         | 3 + 13 part | 26 + 22 part | 29 + 25 part | 30 + 25 part | 14 + 13 part |
| Unaligned contigs length    | 53,103      | 50,325       | 60,348       | 97,305       | 59,506       |
| Genome fraction (%)         | 83.30       | 82.82        | 81.54        | 82.01        | 83.19        |
| Duplication ratio           | 1.19        | 1.14         | 1.15         | 1.13         | 1.19         |
| # N's per 100 kbp           | 86.89       | 89.14        | 245.98       | -            | -            |
| # mismatches per 100 kbp    | 2,327.32    | 2,329.52     | 2,291.03     | 2,293.70     | 2,310.98     |
| # indels per 100 kbp        | 80.17       | 87.85        | 96.39        | 74.48        | 91.29        |
| Largest alignment           | 125,616     | 125,616      | 125,563      | 74,151       | 125,616      |
| NA50                        | 23,245      | 23,245       | 26,953       | 18,426       | 27,048       |
| NGA50                       | 23,245      | 21,876       | 26,356       | 18,167       | 30,232       |
| NA75                        | 9,296       | 9,335        | 8,702        | 6,988        | 9,320        |
| NGA75                       | 9,847       | 7,570        | 6,785        | 6,052        | 10,040       |
| LA50                        | 24          | 24           | 22           | 31           | 23           |
| LGA50                       | 24          | 26           | 23           | 32           | 22           |
| LA75                        | 60          | 59           | 56           | 75           | 55           |
| LGA75                       | 59          | 66           | 63           | 82           | 54           |

| F.tularensis                | ABySS      | SGA         | SOAP2       | SPAdes       | SAGE        |
|-----------------------------|------------|-------------|-------------|--------------|-------------|
| # contigs (>= 0 bp)         | 133        | 123         | 289         | 125          | 148         |
| # contigs (>= 1000 bp)      | 96         | 99          | 96          | 96           | 94          |
| Total length (>= 0 bp)      | 1,872,907  | 1,782,320   | 1,801,735   | 1,802,750    | 1,803,179   |
| Total length (>= 1000 bp)   | 1,868,305  | 1,773,968   | 1,771,846   | 1,794,938    | 1,787,585   |
| # contigs                   | 97         | 123         | 103         | 112          | 124         |
| Total length                | 1,869,289  | 1,782,320   | 1,775,500   | 1,801,533    | 1,800,094   |
| Largest contig              | 88,166     | 87,501      | 87,485      | 87,891       | 87,908      |
| Reference length            | 1,892,775  | 1,892,775   | 1,892,775   | 1,892,775    | 1,892,775   |
| GC (%)                      | 32         | 32          | 32          | 32           | 32          |
| Reference GC (%)            | 32         | 32          | 32          | 32           | 32          |
| N50                         | 27,975     | 26,517      | 26,805      | 26,876       | 27,942      |
| NG50                        | 27,727     | 25,217      | 25,184      | 25,906       | 26,867      |
| N75                         | 17,769     | 17,022      | 17,591      | 17,396       | 17,825      |
| NG75                        | 17,633     | 14,541      | 16,053      | 16,022       | 16,986      |
| L50                         | 24         | 23          | 23          | 23           | 22          |
| LG50                        | 25         | 25          | 26          | 25           | 24          |
| L75                         | 45         | 44          | 44          | 44           | 42          |
| LG75                        | 46         | 50          | 49          | 48           | 46          |
| # misassemblies             | 94         | 35          | 34          | 28           | 26          |
| Misassembled contigs length | 1,279,582  | 545,256     | 604,515     | 480,769      | 467,090     |
| # local misassemblies       | 46         | 46          | 47          | 46           | 56          |
| # unaligned contigs         | 0 + 1 part | 1 + 16 part | 2 + 11 part | 11 + 18 part | 1 + 10 part |
| Unaligned contigs length    | 3,324      | 5,351       | 8,762       | 8,540        | 4,215       |
| Genome fraction (%)         | 95.61      | 93.07       | 92.58       | 93.80        | 93.56       |
| Duplication ratio           | 1.03       | 1.01        | 1.01        | 1.01         | 1.02        |
| # N's per 100 kbp           | 0.64       | 8.98        | 22.70       | -            | 15.39       |
| # mismatches per 100 kbp    | 454.98     | 456.06      | 442.25      | 451.31       | 458.65      |
| # indels per 100 kbp        | 63.40      | 65.96       | 85.03       | 58.35        | 72.11       |
| Largest alignment           | 87,729     | 87,426      | 87,417      | 87,801       | 87,862      |
| NA50                        | 25,749     | 25,441      | 26,380      | 26,514       | 26,489      |
| NGA50                       | 25,749     | 23,314      | 23,294      | 23,762       | 23,961      |
| NA75                        | 15,066     | 15,110      | 16,020      | 16,020       | 16,013      |
| NGA75                       | 14,491     | 13,117      | 13,117      | 13,638       | 13,377      |
| LA50                        | 26         | 24          | 24          | 24           | 24          |
| LGA50                       | 26         | 27          | 27          | 26           | 26          |
| LA75                        | 49         | 47          | 47          | 46           | 46          |
| LGA75                       | 50         | 53          | 53          | 51           | 51          |

| L.interrogans               | ABySS      | SGA        | SOAP2      | SPAdes        | SAGE       |
|-----------------------------|------------|------------|------------|---------------|------------|
| # contigs (>= 0 bp)         | 184        | 187        | 418        | 677           | 118        |
| # contigs (>= 1000 bp)      | 59         | 109        | 58         | 132           | 66         |
| Total length (>= 0 bp)      | 4,835,775  | 4,587,608  | 4,631,026  | 4,698,989     | 4,714,477  |
| Total length (>= 1000 bp)   | 4,812,190  | 4,560,156  | 4,575,322  | 4,585,719     | 4,699,920  |
| # contigs                   | 74         | 187        | 100        | 441           | 98         |
| Total length                | 4,820,380  | 4,587,608  | 4,589,482  | 4,678,590     | 4,711,906  |
| Largest contig              | 529,258    | 344,705    | 350,259    | 338,035       | 552,263    |
| Reference length            | 4,277,185  | 4,277,185  | 4,277,185  | 4,338,762     | 4,277,185  |
| GC (%)                      | 35         | 35         | 35         | 35            | 35         |
| Reference GC (%)            | 35         | 35         | 35         | 35            | 35         |
| N50                         | 158,414    | 89,452     | 136,042    | 63,637        | 242,370    |
| NG50                        | 196,390    | 94,110     | 148,198    | 65,245        | 272,239    |
| N75                         | 72,498     | 41,947     | 71,931     | 37,812        | 92,803     |
| NG75                        | 99,581     | 51,998     | 89,369     | 40,458        | 124,755    |
| L50                         | 8          | 15         | 10         | 22            | 7          |
| LG50                        | 6          | 13         | 9          | 20            | 6          |
| L75                         | 19         | 33         | 21         | 48            | 15         |
| LG75                        | 14         | 28         | 18         | 41            | 12         |
| # misassemblies             | 8          | 2          | 7          | 114           | 11         |
| Misassembled contigs length | 727,575    | 74,491     | 340,426    | 2,871,971     | 1,222,667  |
| # local misassemblies       | 29         | 42         | 58         | 159           | 28         |
| # unaligned contigs         | 0 + 1 part | 1 + 2 part | 0 + 2 part | 266 + 13 part | 0 + 1 part |
| Unaligned contigs length    | 525,523    | 349,945    | 350,167    | 434,601       | 347,587    |
| Genome fraction (%)         | 99.49      | 98.77      | 98.75      | 95.15         | 99.67      |
| Duplication ratio           | 1.03       | 1.02       | 1.02       | 1.04          | 1.04       |
| # N's per 100 kbp           | 26.89      | 66.88      | 209.46     | 42.85         | -          |
| # mismatches per 100 kbp    | 8.20       | 5.44       | 3.50       | 506.00        | 11.10      |
| # indels per 100 kbp        | 10.81      | 13.45      | 42.36      | 75.17         | 4.48       |
| Largest alignment           | 413,583    | 319,895    | 320,270    | 137,901       | 550,746    |
| NA50                        | 102,320    | 71,936     | 108,806    | 36,540        | 178,041    |
| NGA50                       | 117,711    | 83,128     | 132,993    | 38,735        | 182,864    |
| NA75                        | 45,117     | 36,142     | 53,558     | 16,344        | 68,620     |
| NGA75                       | 58,556     | 40,333     | 64,594     | 22,071        | 87,232     |
| LA50                        | 12         | 18         | 12         | 38            | 8          |
| LGA50                       | 9          | 16         | 10         | 34            | 7          |
| LA75                        | 29         | 41         | 26         | 83            | 20         |
| LGA75                       | 21         | 35         | 22         | 70            | 16         |

| P.gingivalis                | ABYSS      | SGA        | SOAP2      | SPAdes       | SAGE       |
|-----------------------------|------------|------------|------------|--------------|------------|
| # contigs (>= 0 bp)         | 262        | 128        | 481        | 754          | 146        |
| # contigs (>= 1000 bp)      | 87         | 85         | 73         | 98           | 68         |
| Total length (>= 0 bp)      | 2,356,985  | 2,231,989  | 2,294,166  | 2,385,213    | 2,310,779  |
| Total length (>= 1000 bp)   | 2,324,038  | 2,212,896  | 2,226,886  | 2,230,744    | 2,287,209  |
| # contigs                   | 108        | 128        | 144        | 573          | 115        |
| Total length                | 2,334,502  | 2,231,989  | 2,249,473  | 2,369,767    | 2,306,842  |
| Largest contig              | 190,296    | 171,389    | 184,833    | 154,317      | 196,534    |
| Reference length            | 2,343,476  | 2,343,476  | 2,343,476  | 2,343,476    | 2,343,476  |
| GC (%)                      | 48         | 48         | 48         | 49           | 48         |
| Reference GC (%)            | 48         | 48         | 48         | 48           | 48         |
| N50                         | 43,828     | 41,333     | 48,950     | 35,693       | 56,862     |
| NG50                        | 43,828     | 41,078     | 47,996     | 35,693       | 54,125     |
| N75                         | 23,381     | 21,941     | 24,599     | 15,896       | 27,140     |
| NG75                        | 22,745     | 18,906     | 22,440     | 17,198       | 26,620     |
| L50                         | 15         | 15         | 13         | 17           | 11         |
| LG50                        | 15         | 16         | 14         | 17           | 12         |
| L75                         | 33         | 34         | 29         | 42           | 26         |
| LG75                        | 34         | 38         | 32         | 41           | 27         |
| # misassemblies             | 10         | 5          | 15         | 8            | 17         |
| Misassembled contigs length | 529,971    | 270,834    | 467,351    | 260,197      | 493,006    |
| # local misassemblies       | 11         | 17         | 40         | 10           | 14         |
| # unaligned contigs         | 0 + 0 part | 0 + 0 part | 0 + 1 part | 423 + 0 part | 0 + 0 part |
| Unaligned contigs length    | -          | -          | 209        | 115,848      | -          |
| Genome fraction (%)         | 97.97      | 95.08      | 95.62      | 95.95        | 97.77      |
| Duplication ratio           | 1.02       | 1.00       | 1.00       | 1.00         | 1.01       |
| # N's per 100 kbp           | 26.60      | 73.93      | 129.45     | 0.00         | -          |
| # mismatches per 100 kbp    | 8.84       | 20.28      | 5.44       | 16.59        | 15.62      |
| # indels per 100 kbp        | 1.96       | 15.53      | 8.39       | 5.74         | 11.13      |
| Largest alignment           | 172,567    | 167,699    | 167,686    | 154,317      | 172,565    |
| NA50                        | 35,564     | 40,932     | 47,992     | 32,926       | 54,125     |
| NGA50                       | 35,564     | 37,013     | 42,835     | 32,926       | 54,125     |
| NA75                        | 20,005     | 19,697     | 24,281     | 15,691       | 25,804     |
| NGA75                       | 20,005     | 18,062     | 19,982     | 15,716       | 25,176     |
| LA50                        | 16         | 15         | 13         | 18           | 12         |
| LGA50                       | 16         | 17         | 14         | 18           | 12         |
| LA75                        | 37         | 35         | 30         | 45           | 28         |
| LGA75                       | 37         | 39         | 34         | 44           | 29         |

| E.coli                      | ABYSS      | SGA        | SOAP2      | SPAdes     | SAGE       |
|-----------------------------|------------|------------|------------|------------|------------|
| # contigs (>= 0 bp)         | 486        | 728        | 164        | 382        | 167        |
| # contigs (>= 1000 bp)      | 71         | 591        | 76         | 184        | 73         |
| Total length (>= 0 bp)      | 4,544,118  | 4,424,927  | 4,465,263  | 4,474,348  | 4,499,362  |
| Total length (>= 1000 bp)   | 4,516,394  | 4,358,053  | 4,442,600  | 4,448,324  | 4,474,493  |
| # contigs                   | 74         | 728        | 111        | 215        | 121        |
| Total length                | 4,518,213  | 4,424,927  | 4,458,606  | 4,463,992  | 4,492,807  |
| Largest contig              | 329,942    | 54,214     | 326,207    | 162,474    | 327,258    |
| Reference length            | 4,639,675  | 4,639,675  | 4,639,675  | 4,639,675  | 4,639,675  |
| GC (%)                      | 51         | 51         | 51         | 51         | 51         |
| Reference GC (%)            | 51         | 51         | 51         | 51         | 51         |
| N50                         | 174,909    | 10,942     | 136,627    | 41,512     | 178,305    |
| NG50                        | 135,238    | 10,207     | 132,589    | 40,993     | 172,607    |
| N75                         | 79,940     | 6,217      | 70,499     | 22,762     | 73,226     |
| NG75                        | 74,730     | 5,470      | 60,831     | 20,711     | 67,682     |
| L50                         | 10         | 119        | 12         | 33         | 10         |
| LG50                        | 11         | 130        | 13         | 35         | 11         |
| L75                         | 21         | 256        | 24         | 68         | 21         |
| LG75                        | 22         | 283        | 26         | 74         | 22         |
| # misassemblies             | 26         | 4          | 5          | 22         | 25         |
| Misassembled contigs length | 2,130,793  | 95,739     | 626,592    | 683,304    | 1,888,722  |
| # local misassemblies       | 80         | 1          | 71         | 17         | 83         |
| # unaligned contigs         | 1 + 0 part | 4 + 7 part | 1 + 8 part | 2 + 3 part | 2 + 5 part |
| Unaligned contigs length    | 1,490      | 46,118     | 2,825      | 948        | 4,126      |
| Genome fraction (%)         | 95.62      | 94.10      | 94.80      | 95.09      | 95.42      |
| Duplication ratio           | 1.03       | 1.00       | 1.02       | 1.01       | 1.06       |
| # N's per 100 kbp           | 186.56     | -          | 343.83     | 12.54      | 107.91     |
| # mismatches per 100 kbp    | 11.83      | 8.52       | 6.30       | 15.14      | 11.36      |
| # indels per 100 kbp        | 24.37      | 0.30       | 23.47      | 2.63       | 36.50      |
| Largest alignment           | 326,073    | 54,214     | 325,634    | 162,291    | 326,332    |
| NA50                        | 101,741    | 10,611     | 112,232    | 37,047     | 98,856     |
| NGA50                       | 101,741    | 10,038     | 98,665     | 36,300     | 96,980     |
| NA75                        | 60,003     | 6,082      | 57,468     | 21,491     | 57,961     |
| NGA75                       | 56,943     | 5,270      | 54,790     | 18,706     | 54,784     |
| LA50                        | 13         | 123        | 13         | 36         | 13         |
| LGA50                       | 13         | 133        | 14         | 38         | 14         |
| LA75                        | 26         | 262        | 27         | 74         | 27         |
| LGA75                       | 28         | 291        | 30         | 80         | 29         |

| C.thermocellum              | ABySS      | SGA        | SOAP2        | SPAdes     | SAGE       |
|-----------------------------|------------|------------|--------------|------------|------------|
| # contigs (>= 0 bp)         | 3,194      | 436        | 325          | 2,896      | 354        |
| # contigs (>= 1000 bp)      | 140        | 279        | 133          | 146        | 153        |
| Total length (>= 0 bp)      | 3,907,516  | 3,563,878  | 3,698,354    | 3,746,775  | 3,769,337  |
| Total length (>= 1000 bp)   | 3,753,091  | 3,492,888  | 3,642,276    | 3,578,640  | 3,707,091  |
| # contigs                   | 165        | 436        | 212          | 233        | 261        |
| Total length                | 3,771,171  | 3,563,878  | 3,683,138    | 3,619,141  | 3,756,427  |
| Largest contig              | 186,654    | 106,016    | 186,621      | 195,919    | 186,487    |
| Reference length            | 3,843,301  | 3,843,301  | 3,843,301    | 3,843,301  | 3,843,301  |
| GC (%)                      | 39         | 39         | 39           | 39         | 39         |
| Reference GC (%)            | 39         | 39         | 39           | 39         | 39         |
| N50                         | 53,679     | 25,255     | 57,028       | 59,462     | 57,180     |
| NG50                        | 52,944     | 23,747     | 56,876       | 55,150     | 54,883     |
| N75                         | 32,517     | 11,502     | 34,420       | 31,293     | 35,083     |
| NG75                        | 30,925     | 8,717      | 31,308       | 25,255     | 32,273     |
| L50                         | 20         | 42         | 19           | 18         | 18         |
| LG50                        | 21         | 47         | 20           | 20         | 19         |
| L75                         | 44         | 93         | 40           | 39         | 40         |
| LG75                        | 45         | 114        | 43           | 45         | 42         |
| # misassemblies             | 18         | 1          | 9            | 6          | 32         |
| Misassembled contigs length | 381,996    | 3,070      | 280,458      | 220,044    | 304,372    |
| # local misassemblies       | 9          | -          | 69           | 6          | 164        |
| # unaligned contigs         | 1 + 1 part | 0 + 0 part | 11 + 27 part | 1 + 1 part | 3 + 9 part |
| Unaligned contigs length    | 1,552      | -          | 52,966       | 398        | 6,279      |
| Genome fraction (%)         | 95.78      | 92.63      | 92.81        | 94.08      | 95.85      |
| Duplication ratio           | 1.03       | 1.00       | 1.02         | 1.01       | 1.04       |
| # N's per 100 kbp           | 49.59      | -          | 2,097.42     | 6.52       | 98.66      |
| # mismatches per 100 kbp    | 12.58      | 2.95       | 2.67         | 25.00      | 33.01      |
| # indels per 100 kbp        | 1.87       | 0.20       | 70.52        | 3.18       | 13.03      |
| Largest alignment           | 186,547    | 106,016    | 186,433      | 195,919    | 186,424    |
| NA50                        | 53,679     | 25,255     | 55,279       | 56,894     | 57,180     |
| NGA50                       | 52,944     | 23,747     | 54,744       | 52,142     | 54,883     |
| NA75                        | 30,925     | 11,502     | 31,308       | 31,293     | 32,248     |
| NGA75                       | 28,805     | 8,618      | 25,243       | 25,255     | 29,529     |
| LA50                        | 20         | 42         | 19           | 19         | 18         |
| LGA50                       | 21         | 47         | 20           | 21         | 19         |
| LA75                        | 44         | 93         | 41           | 40         | 41         |
| LGA75                       | 46         | 115        | 46           | 46         | 43         |

| C.elegans                   | ABYSS          | SGA            | SOAP2          | SPAdes         | SAGE           |
|-----------------------------|----------------|----------------|----------------|----------------|----------------|
| # contigs (>= 0 bp)         | 58,161         | 18,284         | 30,934         | 48,136         | 13,628         |
| # contigs (>= 1000 bp)      | 10,005         | 8,742          | 6,037          | 8,324          | 6,217          |
| Total length (>= 0 bp)      | 105,976,443    | 100,885,920    | 103,139,969    | 103,651,580    | 103,493,029    |
| Total length (>= 1000 bp)   | 99,077,994     | 97,442,387     | 98,968,747     | 97,945,454     | 101,320,951    |
| # contigs                   | 17,115         | 18,164         | 9,813          | 15,826         | 9,755          |
| Total length                | 102,314,962    | 100,861,920    | 100,594,200    | 101,072,818    | 102,987,712    |
| Largest contig              | 230,242        | 240,117        | 386,072        | 183,865        | 383,476        |
| Reference length            | 100,286,070    | 100,286,070    | 100,286,070    | 100,286,070    | 100,286,070    |
| GC (%)                      | 36             | 36             | 36             | 36             | 36             |
| Reference GC (%)            | 35             | 35             | 35             | 35             | 35             |
| N50                         | 19,358         | 23,056         | 34,672         | 23,754         | 37,816         |
| NG50                        | 19,954         | 23,239         | 34,919         | 24,126         | 39,311         |
| N75                         | 8,162          | 9,473          | 16,093         | 10,336         | 16,601         |
| NG75                        | 8,686          | 9,651          | 16,255         | 10,613         | 18,129         |
| L50                         | 1,388          | 1,150          | 771            | 1,105          | 744            |
| LG50                        | 1,337          | 1,138          | 766            | 1,089          | 709            |
| L75                         | 3,415          | 2,865          | 1,827          | 2,703          | 1,774          |
| LG75                        | 3,235          | 2,820          | 1,813          | 2,647          | 1,657          |
| # misassemblies             | 1,399          | 144            | 246            | 713            | 1,196          |
| Misassembled contigs length | 11,867,978     | 1,425,459      | 5,816,942      | 9,757,761      | 20,494,756     |
| # local misassemblies       | 6,282          | 2,209          | 2,703          | 839            | 1,474          |
| # unaligned contigs         | 978 + 430 part | 304 + 135 part | 272 + 153 part | 363 + 543 part | 267 + 213 part |
| Unaligned contigs length    | 4,637,025      | 4,615,884      | 4,647,857      | 4,698,012      | 4,725,891      |
| Genome fraction (%)         | 95.49          | 95.19          | 95.28          | 95.48          | 96.94          |
| Duplication ratio           | 1.03           | 1.02           | 1.01           | 1.01           | 1.03           |
| # N's per 100 kbp           | 558.08         | 189.24         | 268.80         | 21.08          | 5.89           |
| # mismatches per 100 kbp    | 24.14          | 6.28           | 10.66          | 59.26          | 26.95          |
| # indels per 100 kbp        | 25.94          | 28.05          | 24.18          | 17.66          | 20.68          |
| Largest alignment           | 213,835        | 239,959        | 382,096        | 171,314        | 383,476        |
| NA50                        | 17,721         | 20,311         | 31,886         | 20,245         | 30,897         |
| NGA50                       | 18,210         | 20,436         | 31,973         | 20,468         | 32,442         |
| NA75                        | 6,594          | 7,397          | 13,089         | 7,809          | 12,609         |
| NGA75                       | 7,126          | 7,596          | 13,232         | 8,122          | 14,095         |
| LA50                        | 1,476          | 1,257          | 835            | 1,287          | 861            |
| LGA50                       | 1,419          | 1,243          | 830            | 1,268          | 819            |
| LA75                        | 3,813          | 3,291          | 2,065          | 3,262          | 2,144          |
| LGA75                       | 3,591          | 3,233          | 2,047          | 3,187          | 1,992          |
